# Supplementary material
Source: Springer Nature journal article supplement (https://www.springermedizin.de/resource/supplementary/12889_2011_3152_MOESM3_ESM.pdf/9488188)
Supplement: MOESM3 [file 9488188]

|                          | Age (years) |   |   |   |   |   |
|--------------------------|-------------|---|---|---|---|---|
|                          | 1           | 2 | 3 | 4 | 5 | 6 |
| <b>Anthropometry</b>     |             |   |   |   |   |   |
| BMI / Waist (C+P)        | x           | x | x | x | x | x |
| Blood pressure (C+P)     | x           | x | x | x | x | x |
| <b>Biomarkers</b>        |             |   |   |   |   |   |
| Blood (C+P)              | x           |   | x |   |   | x |
| Feces (C)                | x           | x | x | x | x | x |
| Saliva (C+P)             | x           | x | x | x | x | x |
| <b>Diet</b>              |             |   |   |   |   |   |
| Survey (C+P)             | X           | x | x | x | x | x |
| Diary (C+P)              | x           | x | x | x | x | x |
| <b>Physical Activity</b> |             |   |   |   |   |   |
| Survey (C)               | x           | x | x | x | x | x |
| Accelerometer (C+P)      | x           | x | x | x | x | x |
| Hempel Assessment (C)    |             | x |   | x |   | x |
| <b>Sleep</b>             |             |   |   |   |   |   |
| Survey (C+P)             |             | x |   | x |   | x |
| Diary (C+P)              |             | x |   | x |   | x |
| Accelerometer (C+P)      |             | x |   | x |   | x |
| <b>Stress</b>            |             |   |   |   |   |   |
| Survey (P)               |             | x | x |   |   | x |

C=Child, P=Parents
